# Supplementary material for: Surfactant-free green synthesis of Fe3O4 nanoparticles capped with 3,4-dihydroxyphenethylcarbamodithioate: stable recyclable magnetic nanoparticles for the rapid and efficient removal of Hg(ii) ions from water
Source: Royal Society of Chemistry journal article supplement (doi:10.1039/c5dt03155a), 2015-01-01
Supplement: c5dt03155a1.pdf [file c5dt03155a1.pdf]

## **Electronic Supplementary Information**

# **Surfactant-Free Green Synthesis of Fe<sub>3</sub>O<sub>4</sub> Nanoparticles capped with 3,4-Dihydroxyphenethylcarbamodithioate: Stable Recyclable Magnetic Nanoparticles for Rapid and Efficient Removal of Hg(II) Ions from Water**

Sada Venkateswarlu and Minyoung Yoon\*

Department of Nanochemistry, College of Bionano, Gachon University, Sungnam, 13120, Republic of Korea

\*Corresponding author. Tel.: 82-31-750-8721.

E-mail address: [myyoon@gachon.ac.kr](mailto:myyoon@gachon.ac.kr)

### Pseudo-first-order kinetics study

The linear form of pseudo-first-order kinetic model is described by the equation

$$\log(q_e - q_t) = \log q_e - \left( \frac{k_1}{2.303} \right) t \quad (1)$$

Where  $k_1$  ( $\text{min}^{-1}$ ) is a pseudo-first-order rate constant of adsorption, where  $q_e$  ( $\text{mg/g}$ ) and  $q_t$  ( $\text{mg/g}$ ) are the amount of the Hg(II) adsorbed at equilibrium and at time  $t$ , respectively. The pseudo-first-order kinetic constant was determined from slope of the plot of  $\log(q_e - q_t)$  vs  $t$ .

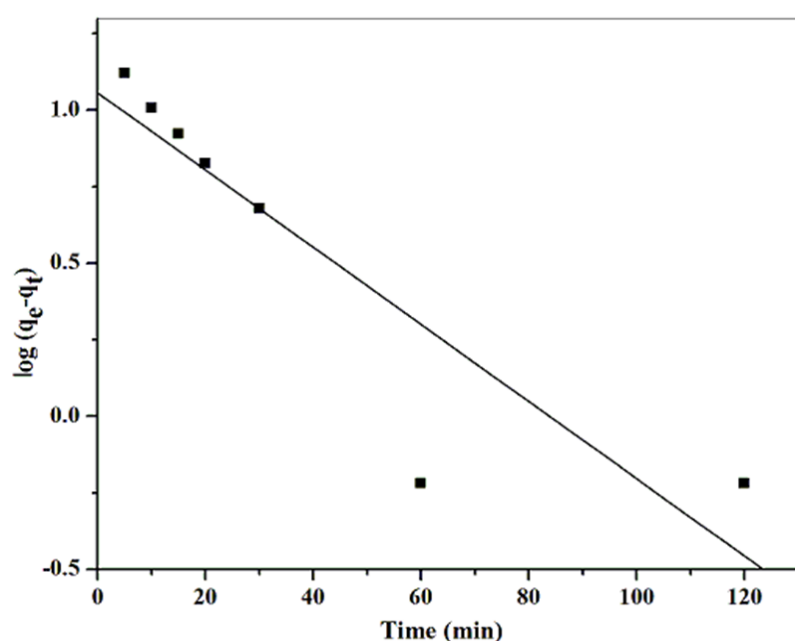

**Figure S1.** Pseudo first-order adsorption kinetics of Hg(II) on DHPCT@Fe<sub>3</sub>O<sub>4</sub> MNPs.

**Table S1.** Kinetic parameters of pseudo-first-order and pseudo-second-order models for the adsorption of Hg(II) on the DHPCT@Fe<sub>3</sub>O<sub>4</sub> MNPs.

| Pseudo-first-order            |                                    |                               |       | Pseudo-second-order                |                               |       |
|-------------------------------|------------------------------------|-------------------------------|-------|------------------------------------|-------------------------------|-------|
| $q_{e, \text{exp}}$<br>(mg/g) | $k_1$<br>(g/mg min <sup>-1</sup> ) | $q_{e, \text{cal}}$<br>(mg/g) | $R^2$ | $k_2$<br>(g/mg min <sup>-1</sup> ) | $q_{e, \text{cal}}$<br>(mg/g) | $R^2$ |
| 19.463                        | 0.0290                             | 11.384                        | 0.905 | 0.0039                             | 21.186                        | 0.999 |

**Table S2.** Langmuir and Freundlich isotherm constants for Hg(II) adsorption

| Isotherm type | Constant     | Value  |
|---------------|--------------|--------|
| Langmuir      | $q_m$ (mg/g) | 52.10  |
|               | $b$ (L/mg)   | 1.654  |
|               | $R^2$        | 0.999  |
| Freundlich    | $k_f$ (mg/g) | 16.707 |
|               | $n$          | 3.503  |
|               | $R^2$        | 0.981  |

### Selective adsorption experiment

The selectivity of the adsorbent material for various metal ions is an important parameter related to the application potential of adsorption processes. Stock solutions for selectivity experiments were prepared using nitrate, sulfate and chloride metal salts ( $\text{Pb}(\text{NO}_3)_2$ ,  $\text{Ni}(\text{NO}_3)_2 \cdot 6\text{H}_2\text{O}$ ,  $\text{CuSO}_4$ ,  $\text{Co}(\text{NO}_3)_2 \cdot 6\text{H}_2\text{O}$ , and  $\text{ZnCl}_2$ ) dissolving in deionized Millipore water. The DHPCT@ $\text{Fe}_3\text{O}_4$  composite (2.5 mg) was placed in a 100 ml Erlenmeyer flask with of a metal ions ( $\text{Pb}(\text{II})$ ,  $\text{Ni}(\text{II})$ ,  $\text{Cu}(\text{II})$ ,  $\text{Co}(\text{II})$ ,  $\text{Zn}(\text{II})$  and  $\text{Hg}(\text{II})$ ) mixture solution (25.0 ml, concentration: 60 mg/L, pH: 7). The mixture solution was ultrasonicated for 10 min and shaken in an incubator for 1 hour at 303 K. After adsorbing with the mixed metal ions, the magnetic nano-adsorbent was separated from the solution by external magnet. The concentrations of the mixed metal ions were determined using atomic absorption spectroscopy (AAS).

### Biogenic synthesis of $\text{Fe}_3\text{O}_4$ to show reproducibility

To study the effect of watermelon rind extract concentration and the reproducibility in  $\text{Fe}_3\text{O}_4$  nanoparticles, the watermelon rind extract solutions with a different concentration were prepared by dilution of original extract solution with distilled water. The volume ratio of watermelon rind extract and water was (20:20, 30:10 and 40:0) with a total solution volume of 40 ml. Due to the dilution effect of the extract solution by the addition of water, the concentration of polyphenols in extract will be decreased resulting in the incomplete formation of  $\text{Fe}_3\text{O}_4$  MNPs. However, 40 ml of

pure watermelon rind extract is suitable for the formation of  $\text{Fe}_3\text{O}_4$  MNPs. With the use of the pure watermelon rind extract derived from different watermelon, we have always found an agglomerated  $\text{Fe}_3\text{O}_4$  MNPs with a similar nanoparticle size and a magnetic property. Therefore, we expect the  $\text{Fe}_3\text{O}_4$  MNP synthesis using watermelon rind extract can be generally applied to the most of watermelons.
